# Supplementary material for: Multilocus sequence typing of Cronobacter sakazakii and Cronobacter malonaticus reveals stable clonal structures with clinical significance which do not correlate with biotypes
Source: Springer Nature journal article supplement (doi:10.1186/1471-2180-9-223), 2009-10-23
Supplement: 12866_2009_894_MOESM2_ESM.pdf [file 12866_2009_894_MOESM2_ESM.pdf]

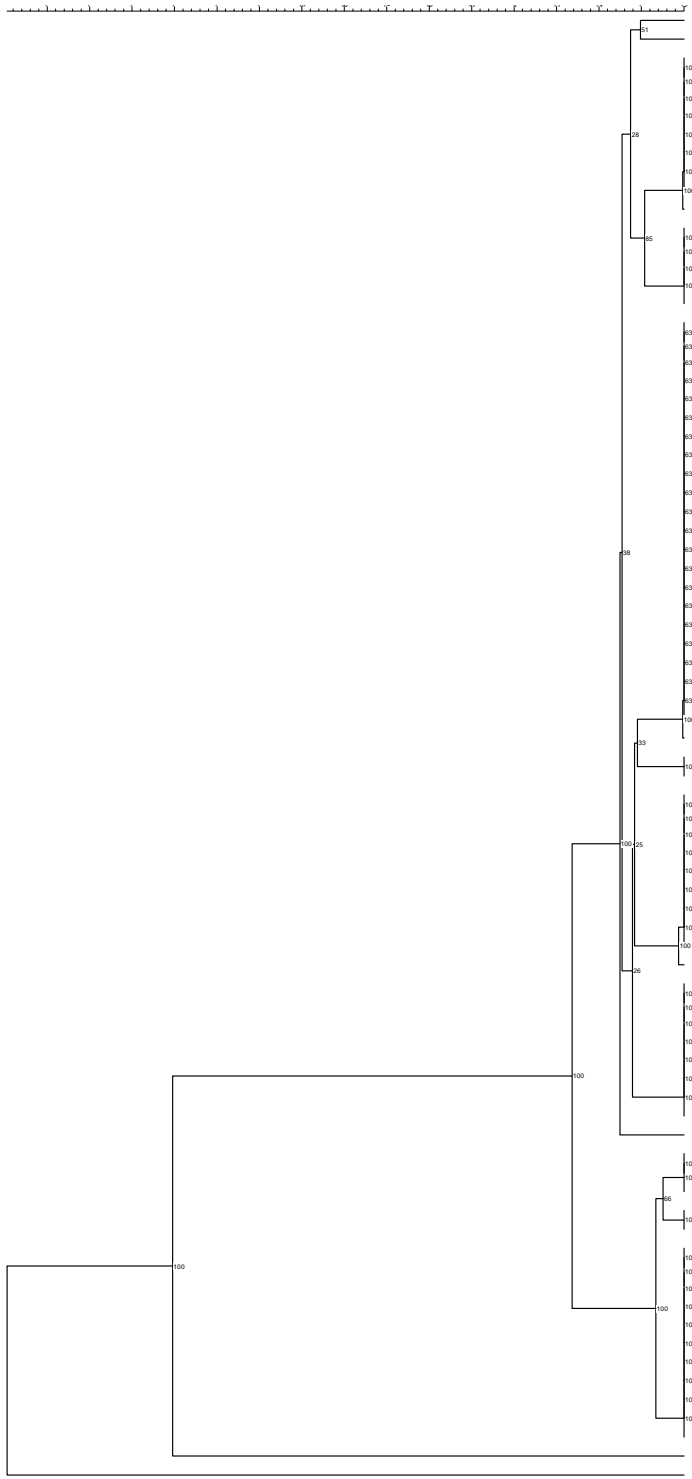

| Species      | Strain      | ST   | BIotype |
|--------------|-------------|------|---------|
| Cronobacter  | sakazakii   | 471  | 17 1    |
| Cronobacter  | sakazakii   | 580  | 18 1    |
| Cronobacter  | sakazakii   | 7    | 1 2     |
| Cronobacter  | sakazakii   | 12   | 1 2     |
| Cronobacter  | sakazakii   | 27   | 1 2     |
| Cronobacter  | sakazakii   | 537  | 1 2     |
| Cronobacter  | sakazakii   | 541  | 1 2     |
| Cronobacter  | sakazakii   | 555  | 1 2     |
| Cronobacter  | sakazakii   | 561  | 1 2     |
| Cronobacter  | sakazakii   | 658  | 1 2     |
| Cronobacter  | sakazakii   | 716  | 14 2    |
| Cronobacter  | sakazakii   | 520  | 12 2a   |
| Cronobacter  | sakazakii   | 567  | 12 13   |
| Cronobacter  | sakazakii   | 690  | 12 3    |
| Cronobacter  | sakazakii   | 696  | 12 1    |
| Cronobacter  | sakazakii   | 1108 | 12 3    |
| Cronobacter  | sakazakii   | 6    | 4 1     |
| Cronobacter  | sakazakii   | 14   | 4 1     |
| Cronobacter  | sakazakii   | 20   | 4 1     |
| Cronobacter  | sakazakii   | 377  | 4 1     |
| Cronobacter  | sakazakii   | 425  | 4 1     |
| Cronobacter  | sakazakii   | 426  | 4 1     |
| Cronobacter  | sakazakii   | 467  | 4 1     |
| Cronobacter  | sakazakii   | 470  | 4 1     |
| Cronobacter  | sakazakii   | 538  | 4 13    |
| Cronobacter  | sakazakii   | 548  | 4 1     |
| Cronobacter  | sakazakii   | 551  | 4 1     |
| Cronobacter  | sakazakii   | 552  | 4 2     |
| Cronobacter  | sakazakii   | 553  | 4 2     |
| Cronobacter  | sakazakii   | 557  | 4 1     |
| Cronobacter  | sakazakii   | 558a | 4 1     |
| Cronobacter  | sakazakii   | 559  | 4 1     |
| Cronobacter  | sakazakii   | 686  | 4 7     |
| Cronobacter  | sakazakii   | 695  | 4 1     |
| Cronobacter  | sakazakii   | 701  | 4 1     |
| Cronobacter  | sakazakii   | 709  | 4 1     |
| Cronobacter  | sakazakii   | 767  | 4 1     |
| Cronobacter  | sakazakii   | 1105 | 4 1     |
| Cronobacter  | sakazakii   | 4    | 15 1    |
| Cronobacter  | sakazakii   | 532  | 13 1    |
| Cronobacter  | sakazakii   | 693  | 13 4    |
| Cronobacter  | sakazakii   | 2    | 3 2     |
| Cronobacter  | sakazakii   | 25   | 3 2     |
| Cronobacter  | sakazakii   | 26   | 3 2     |
| Cronobacter  | sakazakii   | 120  | 3 2     |
| Cronobacter  | sakazakii   | 121  | 3 2     |
| Cronobacter  | sakazakii   | 545  | 3 2     |
| Cronobacter  | sakazakii   | 978  | 3 2     |
| Cronobacter  | sakazakii   | 984  | 3 2     |
| Cronobacter  | sakazakii   | 1106 | 3 2     |
| Cronobacter  | sakazakii   | 1107 | 9 2     |
| Cronobacter  | sakazakii   | 1    | 8 1     |
| Cronobacter  | sakazakii   | 5    | 8 4a    |
| Cronobacter  | sakazakii   | 424  | 8 1     |
| Cronobacter  | sakazakii   | 511  | 8 13a   |
| Cronobacter  | sakazakii   | 513  | 8 4     |
| Cronobacter  | sakazakii   | 526  | 8 13a   |
| Cronobacter  | sakazakii   | 680  | 8 3     |
| Cronobacter  | sakazakii   | 683  | 8 4     |
| Cronobacter  | sakazakii   | 150  | 16 5    |
| Cronobacter  | malonaticus | 507  | 11 13b  |
| Cronobacter  | malonaticus | 512  | 11 2a   |
| Cronobacter  | malonaticus | 514  | 11 14a  |
| Cronobacter  | malonaticus | 90   | 10 5a   |
| Cronobacter  | malonaticus | 156  | 10 5    |
| Cronobacter  | malonaticus | 8    | 7 14a   |
| Cronobacter  | malonaticus | 18   | 7 9     |
| Cronobacter  | malonaticus | 35   | 7 8c    |
| Cronobacter  | malonaticus | 510  | 7 9     |
| Cronobacter  | malonaticus | 515  | 7 4a    |
| Cronobacter  | malonaticus | 521  | 7 9a    |
| Cronobacter  | malonaticus | 522  | 7 9     |
| Cronobacter  | malonaticus | 524  | 7 9     |
| Cronobacter  | malonaticus | 535  | 7 13a   |
| Cronobacter  | malonaticus | 565  | 7 14    |
| Cronobacter  | malonaticus | 681  | 7 9     |
| Enterobacter | koseri      | 6    | 6       |
| Enterobacter | sp          |      | 2       |
